# Supplementary material for: Free-standing 3D nitrogen–carbon anchored Cu nanorod arrays: in situ derivation from a metal–organic framework and strategy to stabilize lithium metal anodes
Source: Royal Society of Chemistry journal article supplement (doi:10.1039/c9ta10772j), 2019-12-09
Supplement: c9ta10772j1.pdf [file c9ta10772j1.pdf]

**Supporting Information for**

**Free-Standing 3D Nitrogen-Carbon Anchored Cu Nanorod Arrays: *In-Situ*  
Derivation from Metal-Organic Framework and Strategy to Stabilize Lithium  
Metal Anode**

*Dongming Yin,<sup>a</sup> Gang Huang,<sup>\*a,c</sup> Shaohua Wang,<sup>a, b</sup> Dongxia Yuan,<sup>a, b</sup> Xuxu Wang,<sup>a, b</sup> Qian Li,<sup>a, b</sup> Qujiang Sun,<sup>a</sup> Hongjin Xue,<sup>a, b</sup> Limin Wang<sup>a, b</sup> and Jun Ming<sup>\*a</sup>*

<sup>a</sup> State Key Laboratory of Rare Earth Resource Utilization, Changchun Institute of Applied Chemistry, Chinese Academy of Sciences Changchun, 130022, P. R. China;

<sup>b</sup> University of Science and Technology of China, Hefei, 230026, P. R. China;

<sup>c</sup> WPI Advanced Institute for Materials Research, Tohoku University, Sendai 980-8577, Japan.

\* To whom correspondence should be addressed: [g.huang@ciac.ac.cn](mailto:g.huang@ciac.ac.cn); [jun.ming@ciac.ac.cn](mailto:jun.ming@ciac.ac.cn).

**Keywords:** Lithium metal anode, metal-organic framework, plating/stripping behavior, dendrite-free, nitrogen-carbon anchored copper

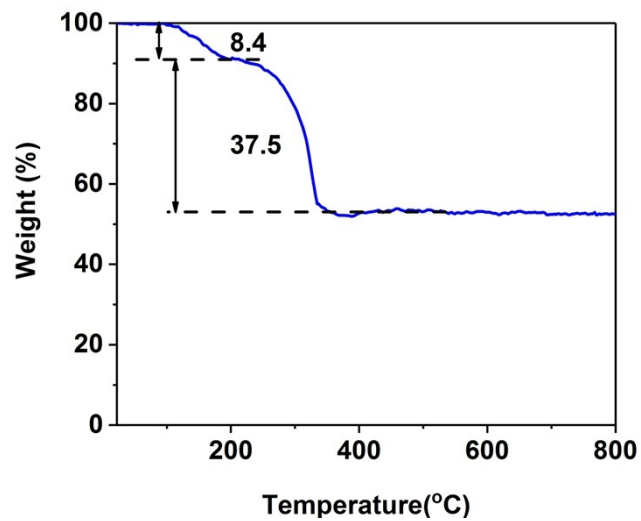

**Figure S1.** TG curve of Cu-MOF.

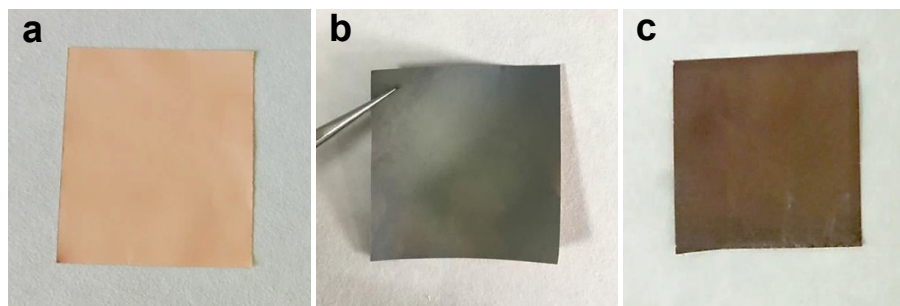

**Figure S2.** Digital photos of (a) Cu foil, (b) Cu-MOF and (c) NC/Cu.

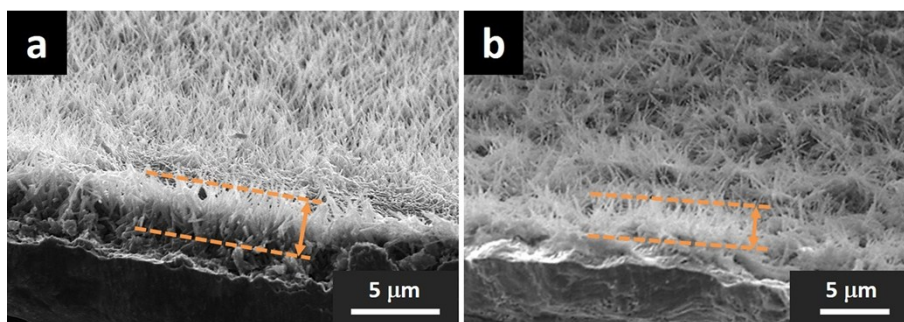

**Figure S3.** Cross-sectional SEM images of (a) Cu-MOF and (b) NC/Cu.

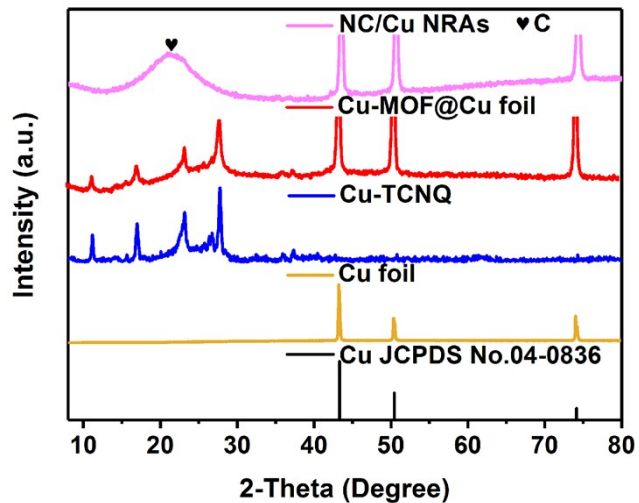

**Figure S4.** XRD patterns of Cu foil, Cu-TCNQ, Cu-MOF@Cu foil and NC/Cu.

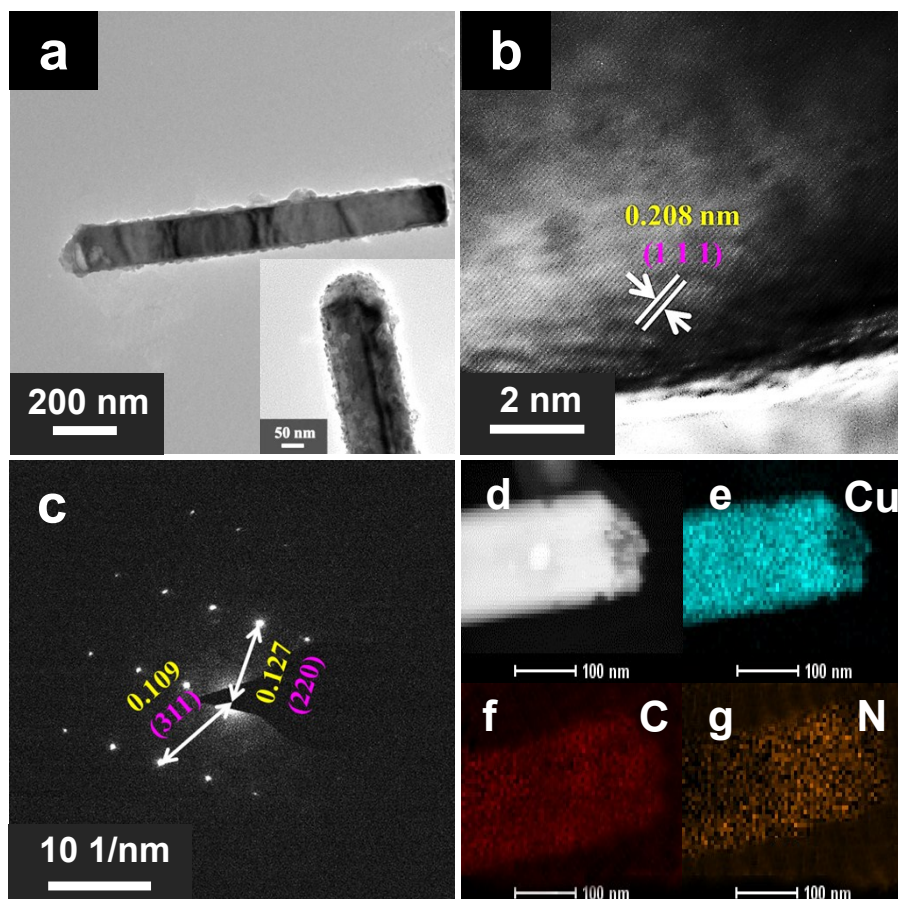

**Figure S5.** (a) TEM image, (b) HRTEM image, (c) SAED pattern, (d) HAADF-STEM image and (e-g) element mapping of NC/Cu.

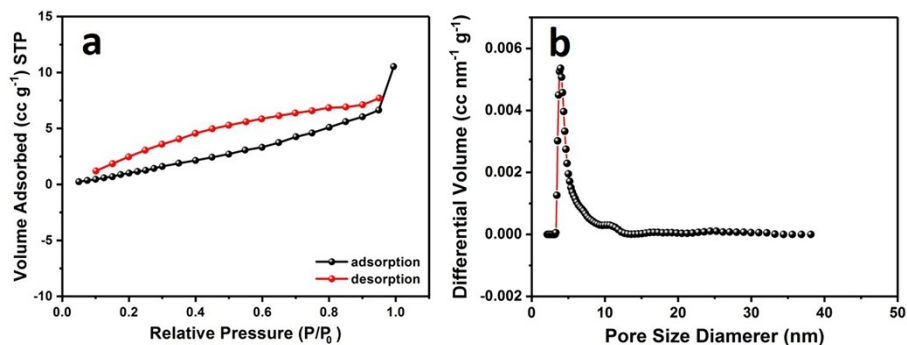

**Figure S6.** (a)  $N_2$  adsorption-desorption isotherms and (b) pore size distribution curves of NC/Cu current collector.

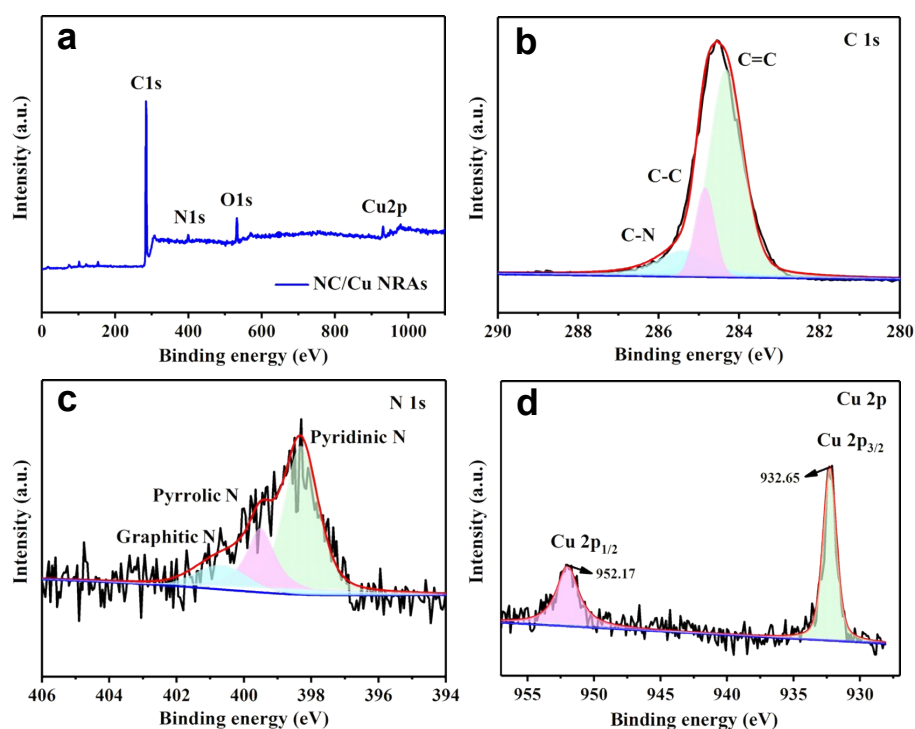

**Figure S7.** XPS spectra of (a) NC-Cu, (b) C 1s, (c) N 1s, and (d) Cu 2p. Note that the presence of O in (a) may result from the absorption of water molecules and oxygen in air.

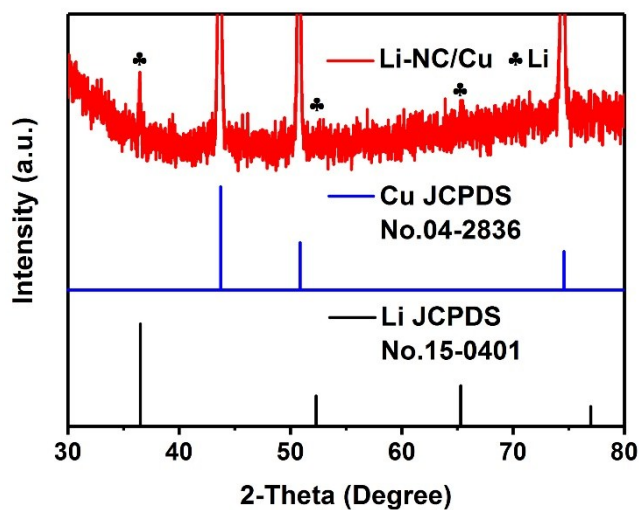

**Figure S8.** XRD pattern of NC/Cu electrode after lithium deposition.

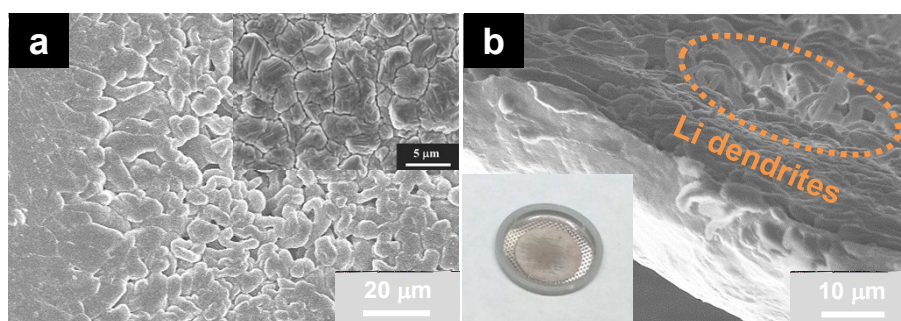

**Figure S9.** (a) Top view and (b) cross-sectional SEM images of lithium on Li-Cu electrode. Inset in (a) and (b) are the SEM image of Cu foil and the digital photo of Li-Cu electrode.

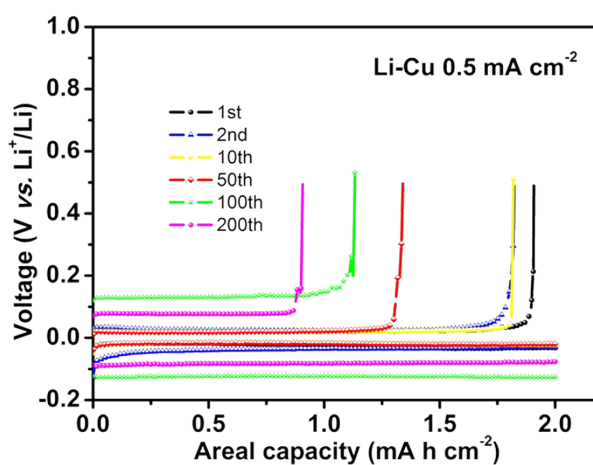

**Figure S10.** Voltage vs. capacity profiles of Li stripping/plating on Cu current collector at different cycles with a current density of  $0.5 \text{ mA cm}^{-2}$  for the areal capacity of  $2 \text{ mAh cm}^{-2}$ .



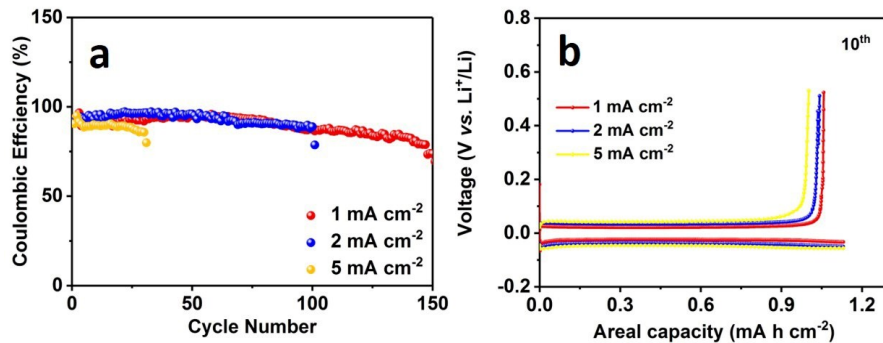

**Figure S11.** (a) Coulombic efficiencies of the cells using NC/Cu current collectors at 1, 2 and 5 mA cm<sup>-2</sup>. (b) The 10<sup>th</sup> voltage vs. capacity profiles of Li stripping/plating on NC/Cu current collectors with a specific capacity of 1 mAh cm<sup>-2</sup> and current densities of 1, 2 and 5 mA cm<sup>-2</sup>.

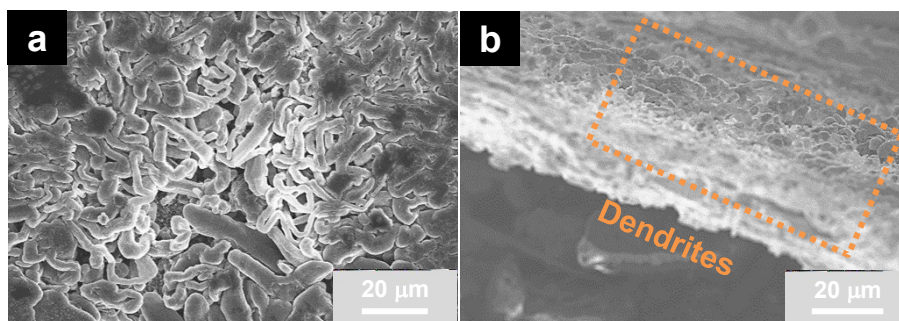

**Figure S12.** (a) Top view and (b) cross-sectional SEM images of Cu foil current collector after lithium deposition at the 50<sup>th</sup> cycle.

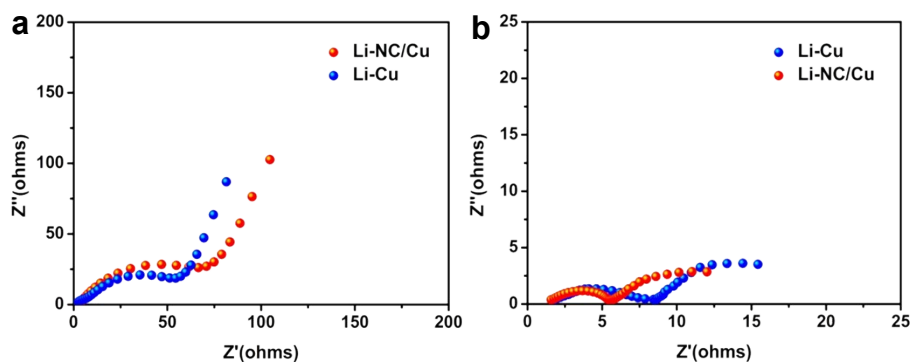

**Figure S13.** Comparative Nyquist plots of Li stripping/plating on NC/Cu and Cu foil current collectors (a) before cycle, (b) after the 50<sup>th</sup> cycles at 0.5 mA cm<sup>-2</sup> with the capacity of 2 mAh cm<sup>-2</sup>.

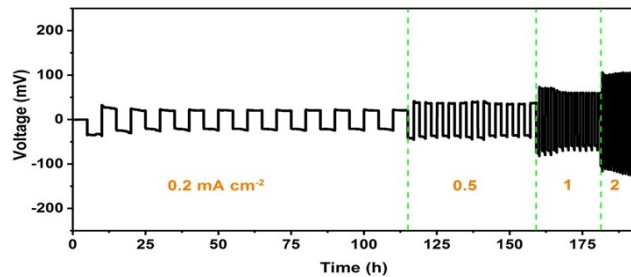

**Figure S14.** The voltage vs. time profiles of the Li-NC/Cu symmetric cell at different current densities.

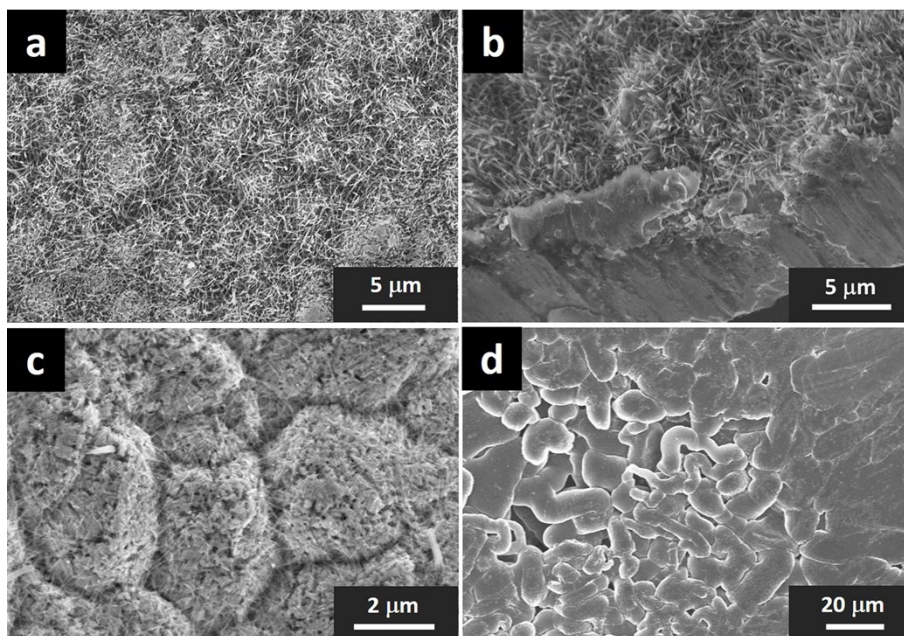

**Figure S15.** SEM images of (a) Cu foil at TCNQ acetonitrile solution for 12 h, (b) the corresponding cross-sectional image, (c) NC/Cu-12 and (d) NC/Cu-12 deposited with 2 mAh cm<sup>-2</sup> of Li.

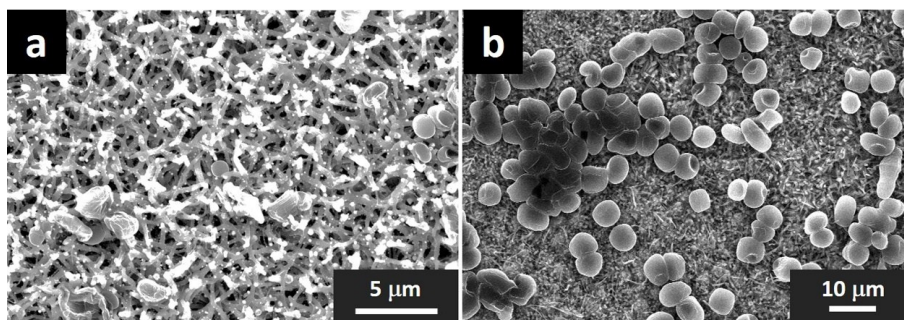

**Figure S16.** SEM images of NC/Cu deposited with (a) 0.2 and (b) 0.5 mAh cm<sup>-2</sup> of Li.

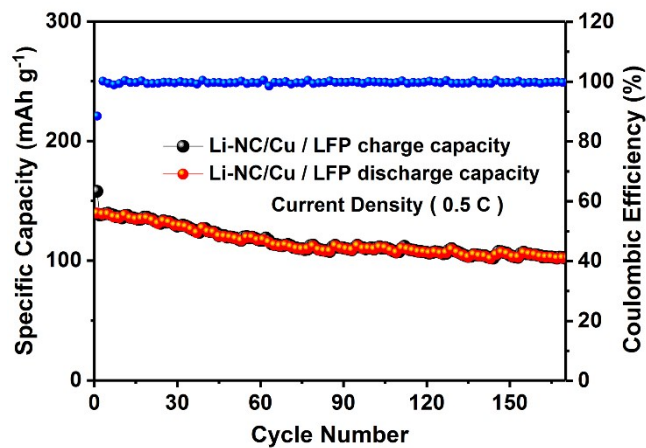

**Figure S17.** Cycling performance of Li-NC/Cu||LFP full cell at 0.5 C.

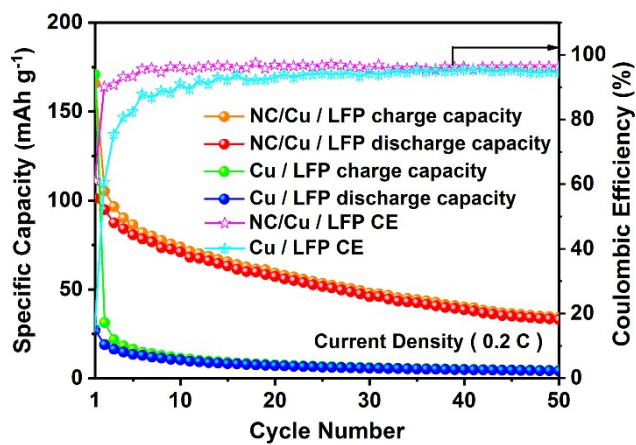

**Figure S18.** The discharge-charge capacities and corresponding CEs of the NC/Cu || LFP and Cu foil || LFP cells at 0.2 C.
